# Supplementary material for: Multicenter analysis of sputum microbiota in tuberculosis patients
Source: PLOS journal article supplement (doi:10.1371/journal.pone.0240250), 2020-10-12
Supplement: S1 (10.1371/journal.pone.0240250.s001) [file journal.pone.0240250.s001]

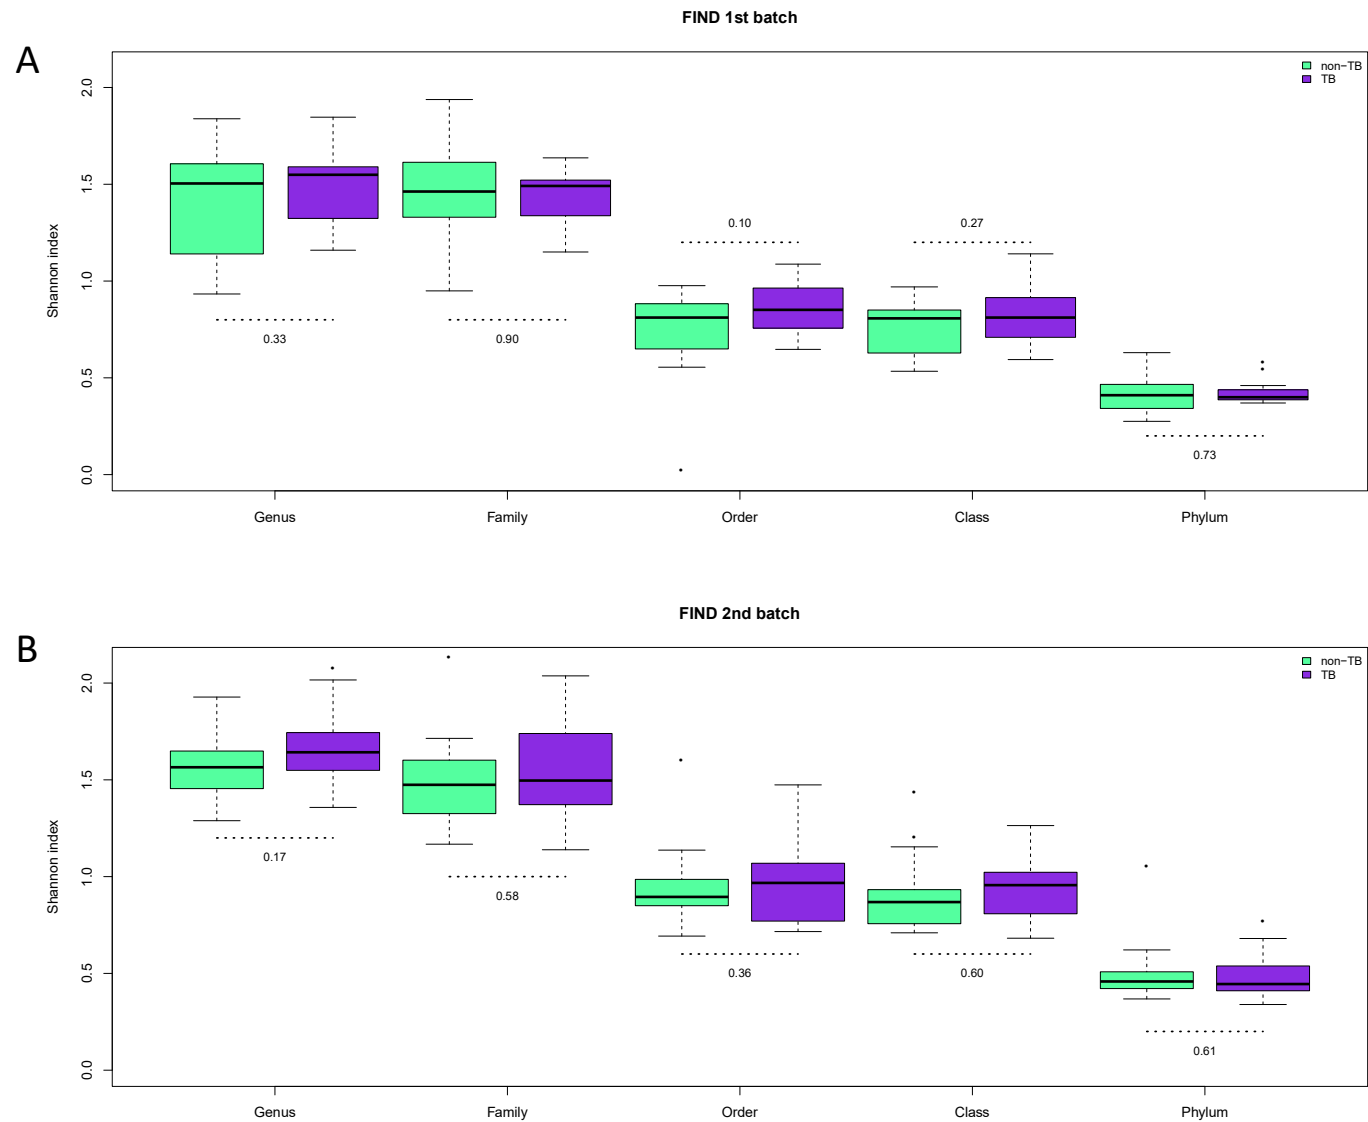

**S1 Figure. Alpha diversity of the first (A) and second (B) batch of sputum samples received from FIND.** The Shannon index was calculated at the Phylum, Class, Order, Family and Genus levels. TB samples are in violet, non-TB samples are in green, p-values of individual two-sided t-tests are shown.
