# Supplementary material for: Multicenter analysis of sputum microbiota in tuberculosis patients
Source: PLOS journal article supplement (doi:10.1371/journal.pone.0240250), 2020-10-12
Supplement: S9 (10.1371/journal.pone.0240250.s009) [file journal.pone.0240250.s009]

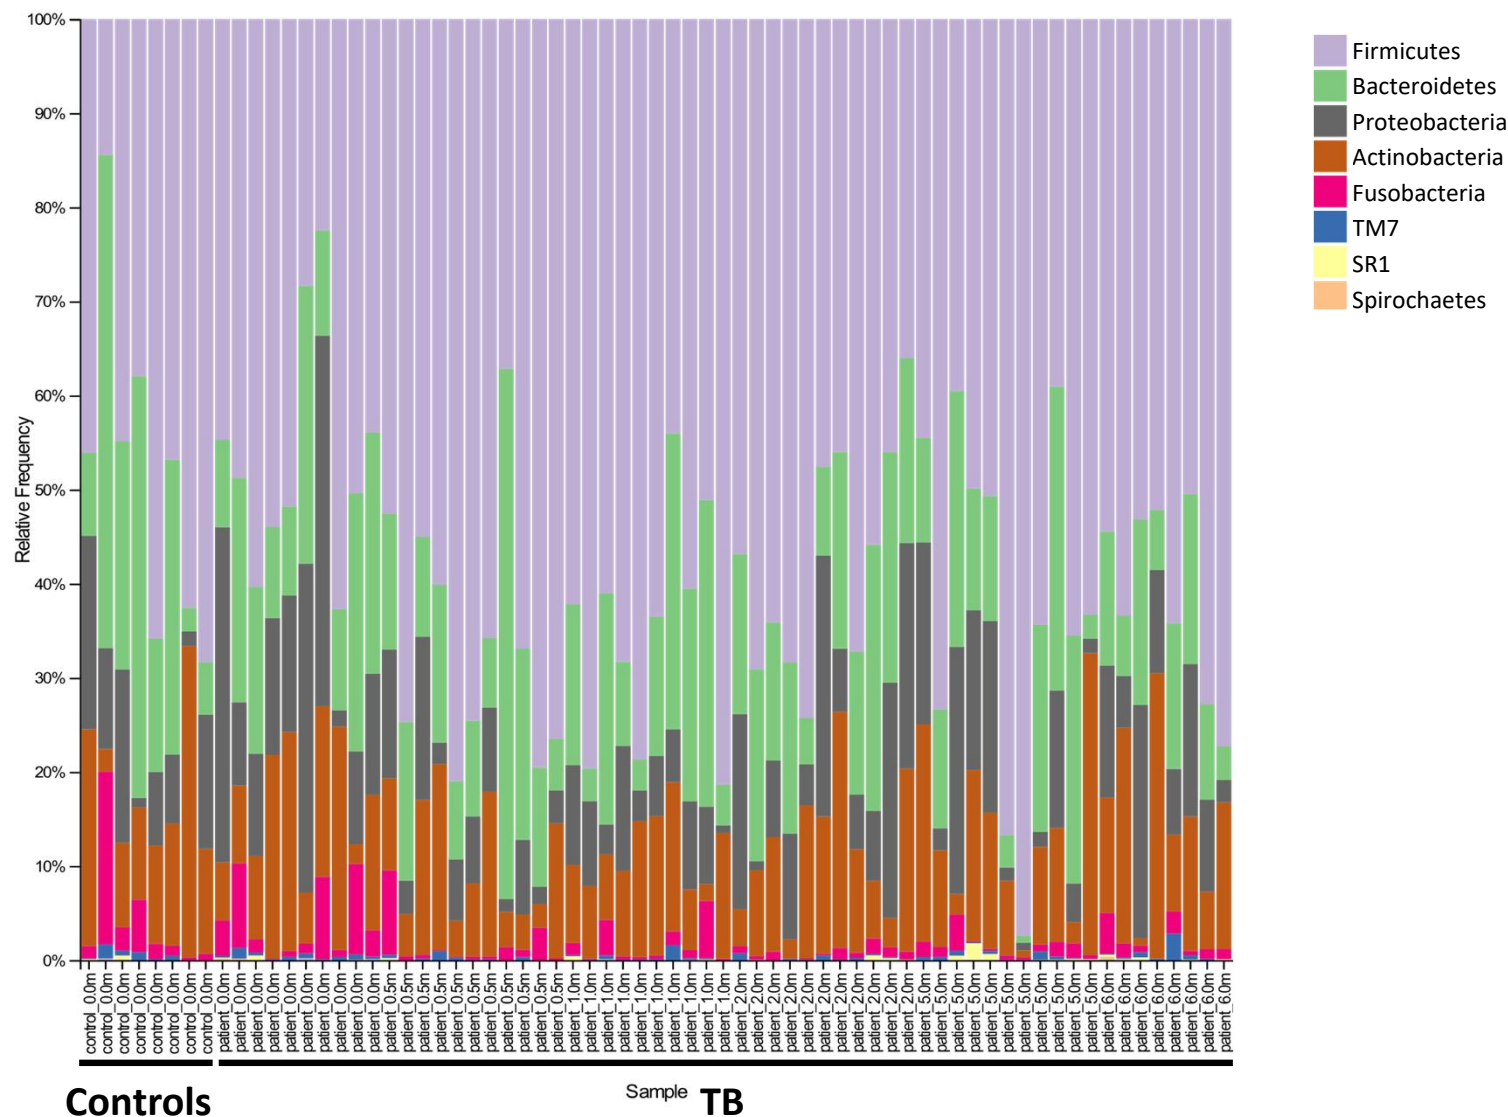

**S9 Figure. Taxonomy at the Phylum level of the sputum samples received from Bangladesh.** Samples from controls or TB patients are listed on the X-axis and grouped according to the time-point. The relative abundance of each Phylum is indicated on the Y-axis.
